# Supplementary material for: Prediction of Esophageal Varices and Variceal Hemorrhage in Patients with Acute Upper Gastrointestinal Bleeding
Source: HighWire-hosted journal article supplement (doi:10.1136/jim-2015-000047), 2016-02-01
Supplement: jim-2015-000047supp.pdf [file jim-2015-000047supp.pdf]

## Supplemental Information

| Supplementary Table 1. Etiology of non-variceal UGIB in patients with cirrhosis |           |
|---------------------------------------------------------------------------------|-----------|
|                                                                                 | N=479     |
| Gastro-duodenal ulcer                                                           | 109 (23%) |
| Portal hypertensive gastropathy                                                 | 93 (19%)  |
| Esophagitis <sup>1</sup>                                                        | 81 (17%)  |
| Mallory-Weiss tear                                                              | 27 (6%)   |
| Gastric varices                                                                 | 5 (1%)    |
| No clear source                                                                 | 100 (21%) |
| Other <sup>2</sup>                                                              | 64 (13%)  |

<sup>1</sup>esophagitis or esophageal ulcer, GE junction ulcer

<sup>2</sup>malignancy, hemobilia, oropharyngeal bleeding, GAVE, Dieulafoy, arteriovenous malformation, gastritis, gastric/duodenal erosions
